# Supplementary material for: Diabetes-Independent Retinal Phenotypes in an Aldose Reductase Transgenic Mouse Model
Source: MDPI journal article supplement (doi:10.3390/metabo11070450), 2021-07-10
Supplement: s1 [file s1]

## Supplementary Materials

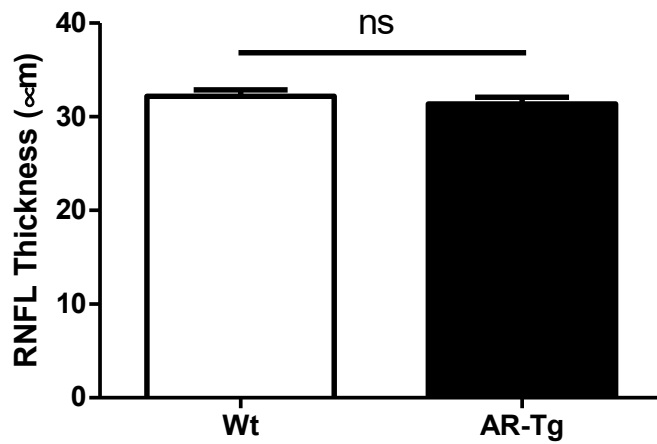

**Figure S1.** Quantification of thickness of the RNFL complex in 3 weeks old mice. Eyes were collected at three weeks of age and used to produce paraffin sections for H&E staining. The thickness of the retinal nerve fiber layer complex in 3 week old mice was measured at  $\geq 5$  sites located along the retina to either side of the optic nerve, similar to that for 18 week old mice shown in Figure S2.

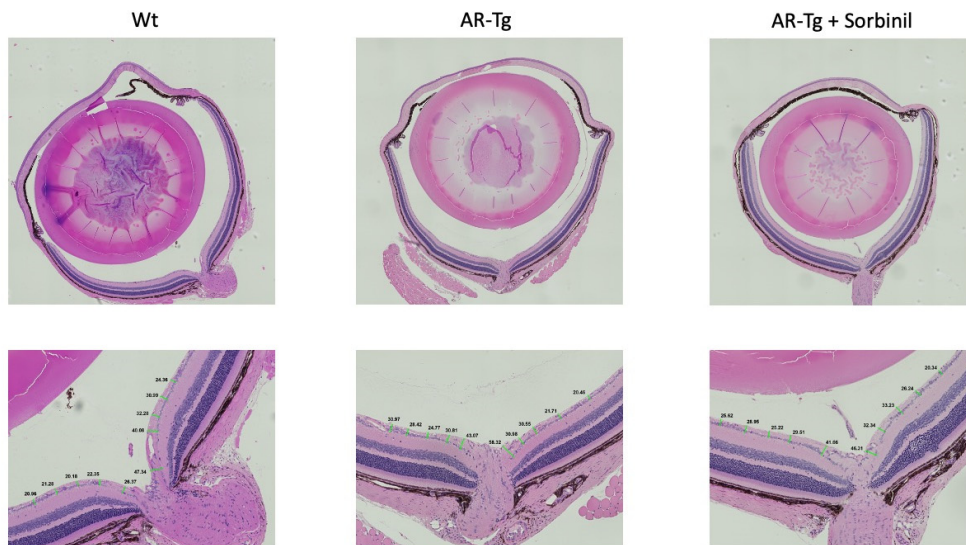

**Figure S2.** Typical histology pictures used for measurements of thickness of the RNFL complex in mice at 18 weeks of age. Thickness ( $\mu\text{m}$ ) of the RNFL complex are shown by green hash marks at various sites surrounding the optic nerve.

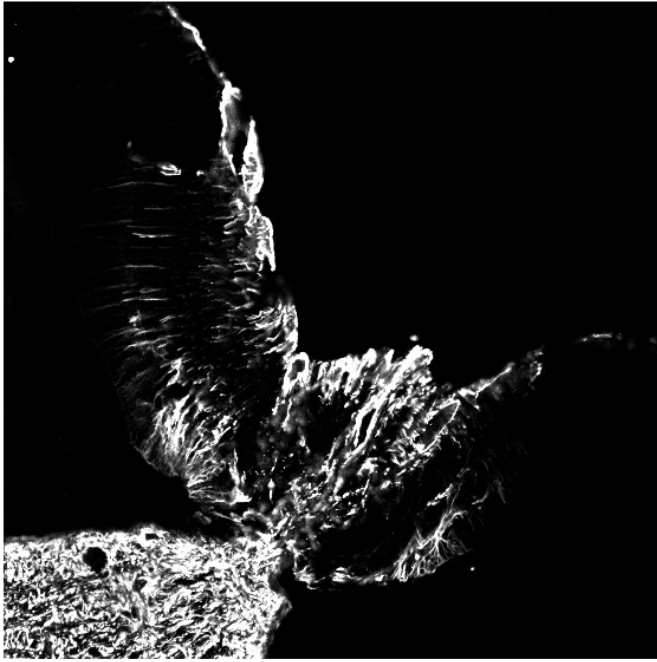

**Figure S3.** Immunostaining for GFAP in AR-Tg (24 weeks). Strong immunostaining was observed in outer retinal layers as well as in the RNFL complex layer.
